# Supplementary material for: Novel lactic acid bacteria strains as inoculants on alfalfa silage fermentation
Source: PubMed Central journal article supplement (PMC6541639; doi:10.1038/s41598-019-44520-9), 2019-05-29
Supplement: 41598_2019_44520_MOESM1_ESM.pdf [file 41598_2019_44520_MOESM1_ESM.pdf]

Novel lactic acid bacteria strains as inoculants on alfalfa silage fermentation

Mariele Cristina Nascimento Agarussi<sup>1\*</sup>, Odilon Gomes Pereira<sup>1\*</sup>, Rosinea Aparecida de Paula<sup>1</sup>,  
Vanessa Paula da Silva<sup>1</sup>, João Paulo Santos Roseira<sup>1</sup>, Fabyano Fonseca e Silva<sup>1</sup>

<sup>1</sup>Department of Animal Science, Federal University of Vicosa, Viçosa, 36570-000 Brazil.

\*Correspondence and requests for materials should be addressed to O.P. (odilon@ufv.br)

**Table S1.** Characterization of lactic acid bacteria isolated from non-wilted and wilted alfalfa silages

| Isolate ID               |                       | 3.7 E                          | 14.7 SE                       | 14.15 SE                       |
|--------------------------|-----------------------|--------------------------------|-------------------------------|--------------------------------|
| Identification           |                       | <i>Lactobacillus plantarum</i> | <i>Lactobacillus pentosus</i> | <i>Pediococcus pentosaceus</i> |
| Access number            |                       | MH924275                       | MH924298                      | MH924301                       |
| Control condition        | MRS/37°C              | +++                            | ++++                          | +++                            |
| Temperature (°C)§        | 15                    | +                              | +                             | +                              |
|                          | 45                    | -                              | +                             | +                              |
| pH§                      | 3.5                   | +                              | +                             | +                              |
|                          | 4                     | +                              | +                             | +                              |
|                          | 4.5                   | +                              | +                             | +                              |
|                          | 8.5                   | +                              | +                             | +                              |
|                          | g/L NaCl§             | 40                             | +                             | +                              |
|                          | 65                    | +                              | +                             | +                              |
|                          | CO <sub>2</sub> *     | Ho                             | Ho                            | Ho                             |
| 1†                       | Radius of inhibition‡ | ++                             | ++                            | ++                             |
| 2†                       |                       | ++                             | ++                            | ++                             |
| 3†                       |                       | ++                             | ++                            | ++                             |
| pH                       | After 24h             | 4.18                           | 4.12                          | 4.25                           |
| Metabolites (g/kg of DM) | Lactic acid           | 14.9                           | 15.1                          | 13.3                           |
|                          | Acetic acid           | 3.1                            | 2.8                           | 1.9                            |
|                          | Propionic acid        | 0                              | 0.1                           | 0.2                            |

§: Growth measured by optical density (630 nm) - = Absence of growth; + = Presence of growth;  
\*Ho: Homofermentative; He: Heterofermentative; †: Indicator microorganisms of the antimicrobial test. 1- *Listeria monocytogenes* 19117; 2- *Listeria monocytogenes* 7644; 3- *Escherichia Coli*; ‡: (mm) : - (absence of inhibition halo), + (> 4 and ≤ 15), ++ (> 15 and ≤ 30), +++ (> 30).
